# Supplementary material for: Pearson’s Principle-Inspired Robust 2D Amorphous Ni-Fe-Co Ternary Hydroxides on Carbon Textile for High-Performance Electrocatalytic Water Splitting
Source: MDPI journal article supplement (doi:10.3390/nano12142416), 2022-07-14
Supplement: s1 [file s1]

# Pearson's Principle-Inspired Robust 2D Amorphous Ni-Fe-Co Ternary Hydroxides on Carbon Textile for High-Performance Electrocatalytic Water Splitting

Rong Hu <sup>1,†</sup>, Huiyu Jiang <sup>1,†</sup>, Jinglin Xian <sup>1,†</sup>, Shiyun Mi <sup>1</sup>, Liyun Wei <sup>1</sup>, Guangyu Fang <sup>1</sup>, Jiayue Guo <sup>1</sup>, Siqu Xu <sup>1</sup>, Ziyang Liu <sup>1</sup>, Huanyu Jin <sup>2,\*</sup>, Huimin Yu <sup>3,\*</sup> and Jun Wan <sup>1,\*</sup>

<sup>1</sup> State Key Laboratory of New Textile Materials and Advanced Processing Technologies, Hubei Key Laboratory of Biomass Fibers and Eco-Dyeing & Finishing, Wuhan Textile University, Wuhan 430200, China; fulonlon@163.com (R.H.); huiyujiang@wtu.edu.cn (H.J.); xianjinglin1006@163.com (J.X.); mishiyun0426@163.com (S.M.); wly9520ft@163.com (L.W.); mmyz1031@163.com (G.F.); 2105250704@mail.wtu.edu.cn (J.G.); 1905250434@mail.wtu.edu.cn (S.X.); lzy1341969071@163.com (Z.L.)

<sup>2</sup> Institute for Sustainability, Energy and Resources, The University of Adelaide, Adelaide, SA 5005, Australia  
<sup>3</sup> Future Industries Institute, University of South Australia, Mawson Lakes Campus, Adelaide, SA 5095, Australia

\* Correspondence: huanyu.jin@adelaide.edu.au (H.J.); huimin.yu@unisa.edu.au (H.Y.); wanj@wtu.edu.cn (J.W.)

† These authors contributed equally to the work.

## 1. Figures S1 to S2

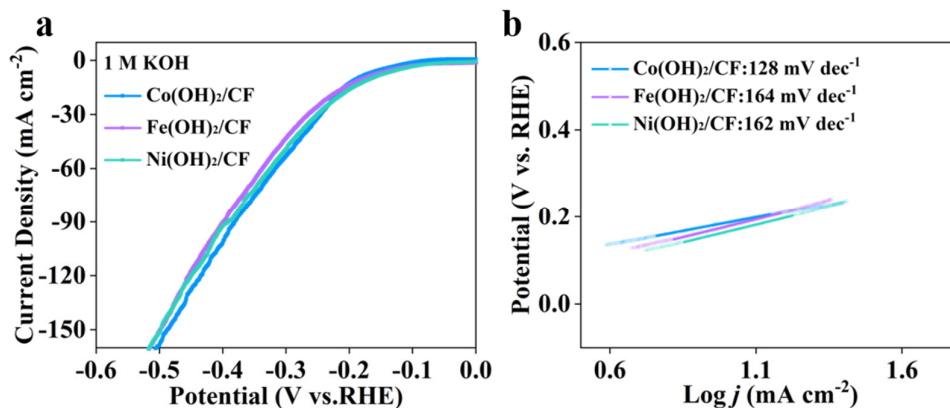

Figure S1. The LSV curves (a) and Tafel slope (b) of monohydroxide hydroxides.

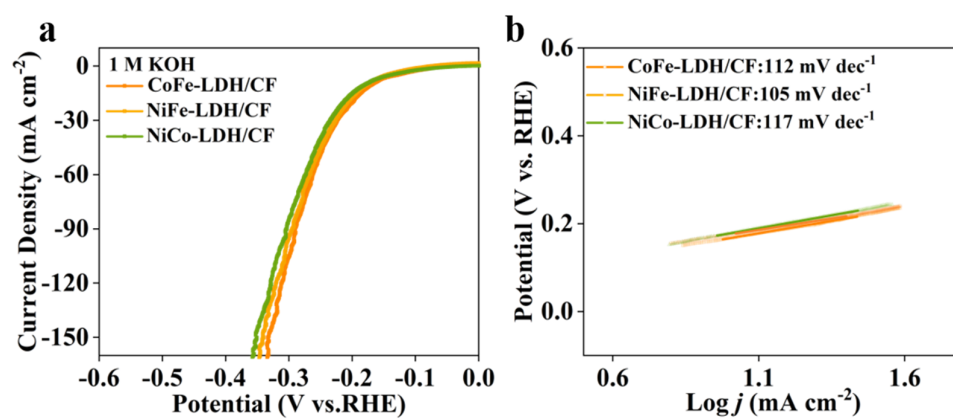

Figure S2. The LSV curves (a) and Tafel slope (b) of binary hydroxides.

## 2. Table S1

**Table S1.** Comparison of HER performance in common LDH.

| Reference                                                  | Material                                  | Electrolyte | $\eta_{10}$<br>(mV vs.RHE) | Tafel slop<br>(mV dec <sup>-1</sup> ) |
|------------------------------------------------------------|-------------------------------------------|-------------|----------------------------|---------------------------------------|
| This Work                                                  | NiFeCo-LDH/CF                             | 1 M KOH     | 151                        | 67                                    |
| <i>Small</i> 2019, 15, e1902551 [1]                        | CoFe LDH                                  | 1 M KOH     | 120                        | 134                                   |
| <i>Electrochim. Acta</i> 2021, 395, [2]                    | NiFeW-LDHs                                | 1 M KOH     | 117                        | 112                                   |
| <i>J. Mater. Chem. A</i> 2020, 8, 2490-2497.[3]            | CoFe LDH                                  | 1 M KOH     | 194                        | 127                                   |
| <i>Adv Mater</i> 2018, 30, 1706279.[4]                     | NiFe-LDH                                  | 1 M KOH     | 269                        | 153                                   |
| <i>ACS Sustainable Chem. Eng.</i> 2019, 7, 10035-10043.[5] | NiFe-LDHs                                 | 1 M KOH     | 145                        | 90                                    |
| <i>Dalton Trans.</i> 2017, 46, 8372-8376.[6]               | NiCo-LDH                                  | 1 M KOH     | 130                        | 141                                   |
| <i>J. Mater. Chem. A</i> 2016, 4, 7245-7250.[7]            | Ni <sub>2.5</sub> Co <sub>0.5</sub> Fe-OH | 1 M KOH     | 110                        | 93                                    |
| <i>ACS Appl. Energy Mater.</i> 2018, 1, 1200-1209.[8]      | CoFe LDH@g-C <sub>3</sub> N <sub>4</sub>  | 1 M KOH     | 210                        | 79                                    |
| <i>Adv. Mater.</i> 2017, 29, 1700017. [9]                  | NiFeLDH@DG                                | 1 M KOH     | 270                        | 110                                   |
| <i>Nanoscale</i> 2018, 10, 19484-19491.[10]                | NiFeLDH                                   | 1 M KOH     | 220                        | 74                                    |
| <i>Energy Environ. Sci.</i> 2019, 12, 572-581. [11]        | NiFeLDH                                   | 1 M KOH     | 210                        | 78                                    |
| <i>Small</i> 2018, 14, 1702568.[12]                        | CoFe-OH/Nifoam                            | 1 M KOH     | 110                        | 72                                    |
| <i>ACS Appl. Mater. Inter.</i> 2018, 10, 42453-42468.[13]  | CoFe LDH with trace Fe                    | 1 M KOH     | 170                        | 83                                    |
| <i>ACS Appl. Mater. Inter.</i> 2016, 8, 34474-34481.[14]   | Defected CoFe LDH                         | 1 M KOH     | 300                        | 95                                    |
| <i>Adv. Funct. Mater.</i> 2018, 28, 1804361.[15]           | Au/ CoNi LDH                              | 1 M KOH     | 210                        | 92                                    |

## 3. Reference

- Meng, X.; Han, J.; Lu, L.; Qiu, G.; Wang, Z.L.; Sun, C. Fe(2+) -Doped Layered Double (Ni, Fe) Hydroxides as Efficient Electrocatalysts for Water Splitting and Self-Powered Electrochemical Systems. *Small* **2019**, 15, e1902551.
- Ding, L.; Li, K.; Xie, Z.; Yang, G.; Yu, S.; Wang, W.; Cullen, D.A.; Yu, H.; Zhang, F. W-Induced Morphological Modification of NiFe Layered Double Hydroxides as Efficient Electrocatalysts for Overall Water Splitting. *Electrochim. Acta* **2021**, 395, 139199.
- Liu, S.; Zhu, J.; Sun, M.; Ma, Z.; Hu, K.; Nakajima, T.; Liu, X.; Schmuki, P.; Wang, L. Promoting the Hydrogen Evolution Reaction through Oxygen Vacancies and Phase Transformation Engineering on Layered Double Hydroxide Nanosheets. *J. Mater. Chem. A* **2020**, 8, 2490-2497.
- Chen, G.; Wang, T.; Zhang, J.; Liu, P.; Sun, H.; Zhuang, X.; Chen, M.; Feng, X. Accelerated Hydrogen Evolution Kinetics on NiFe-Layered Double Hydroxide Electrocatalysts by Tailoring Water Dissociation Active Sites. *Adv Mater* **2018**, 30, 1706279.
- Babar, P.; Lokhande, A.; Karade, V.; Pawar, B.; Gang, M.G.; Pawar, S.; Kim, J.H. Bifunctional 2D Electrocatalysts of Transition Metal Hydroxide Nanosheet Arrays for Water Splitting and Urea Electrolysis. *ACS Sustainable Chem. Eng.* **2019**, 7, 10035-10043.

6. Liu, W.; Bao, J.; Guan, M.; Zhao, Y.; Lian, J.; Qiu, J.; Xu, L.; Huang, Y.; Qian, J.; Li, H. Nickel–Cobalt-Layered Double Hydroxide Nanosheet Arrays on Ni Foam as a Bifunctional Electrocatalyst for Overall Water Splitting. *Dalton Trans.* **2017**, *46*, 8372–8376.
7. Zhu, X.; Tang, C.; Wang, H. F.; Li, B. Q.; Zhang, Q.; Li, C.; Yang, C.; Wei, F. Monolithic-Structured Ternary Hydroxides as Free-standing Bifunctional Electrocatalysts for Overall Water Splitting. *J. Mater. Chem. A* **2016**, *4*, 7245–7250.
8. Bhowmik, T.; Kundu, M.K.; Barman, S. CoFe Layered Double Hydroxide Supported on Graphitic Carbon Nitrides: An Efficient and Durable Bifunctional Electrocatalyst for Oxygen Evolution and Hydrogen Evolution Reactions. *ACS Appl. Energy Mater.* **2018**, *1*, 1200–1209.
9. Jia, Y.; Zhang, L.; Gao, G.; Chen, H.; Wang, B.; Zhou, J.; Soo, M.T.; Hong, M.; Yan, X.; Qian, G.; Zou, J.; Du, A.; Yao, X. A Hetero-structure Coupling of Exfoliated Ni–Fe Hydroxide Nanosheet and Defective Graphene as a Bifunctional Electrocatalyst for Overall Water Splitting. *Adv. Mater.* **2017**, *29*, 1700017.
10. Ye, W.; Fang, X.; Chen, X.; Yan, D. A Three-Dimensional Nickel–Chromium Layered Double Hydroxide Micro/Nanosheet Array as an Efficient and Stable Bifunctional Electrocatalyst for Overall Water Splitting. *Nanoscale* **2018**, *10*, 19484–19491.
11. Qiu, Z.; Tai, C. W.; Niklasson, G.A.; Edvinsson, T. Direct Observation of Active Catalyst Surface Phases and the Effect of Dynamic Self-Optimization in NiFe-Layered Double Hydroxides for Alkaline Water Splitting. *Energy Environ. Sci.* **2019**, *12*, 572–581.
12. Babar, P.; Lokhande, A.; Shin, H.H.; Pawar, B.; Gang, M.G.; Pawar, S.; Kim, J.H. Cobalt Iron Hydroxide as a Precious Metal-Free Bifunctional Electrocatalyst for Efficient Overall Water Splitting. *Small* **2018**, *14*, 1702568.
13. Rajeshkhanna, G.; Singh, T.I.; Kim, N.H.; Lee, J.H. Remarkable Bifunctional Oxygen and Hydrogen Evolution Electrocatalytic Activities with Trace-Level Fe Doping in Ni- and Co-Layered Double Hydroxides for Overall Water-Splitting. *ACS Appl. Mater. Inter.* **2018**, *10*, 42453–42468.
14. Liu, P.F.; Yang, S.; Zhang, B.; Yang, H.G. Defect-Rich Ultrathin Cobalt–Iron Layered Double Hydroxide for Electrochemical Overall Water Splitting. *ACS Appl. Mater. Inter.* **2016**, *8*, 34474–34481.
15. Sultana, U.K.; Riches, J.D.; O'Mullane, A.P. Gold Doping in a Layered Co-Ni Hydroxide System Via Galvanic Replacement for Overall Electrochemical Water Splitting. *Adv. Funct. Mater.* **2018**, *28*, 1804361.
